# Supplementary material
Source: HighWire-hosted journal article supplement (http://www.ajnr.org/highwire/filestream/78216/field_highwire_adjunct_files/0/20-00805.pdf)
Supplement: 20-00805.pdf [file 20-00805.pdf]

**On-line Table: MR imaging brain findings reported in patients with COVID-19**

| Articles                | No. of Patients with Brain MR Imaging | Location | Type of Study and Clinical Features of Patients with COVID-19                                                                                        | Average Age and Sex                              | Findings                                                                                                                                                                                                                                                                                                                                                                                                                                                                                                                                                                                                                                                                                                                                                                                                                                                                                                                                                                                                                                                                                                                                                                                                                                                                                                                                                                                                                                                                                                                                                                                                                                                                                                                                                                                                                                                                   |
|-------------------------|---------------------------------------|----------|------------------------------------------------------------------------------------------------------------------------------------------------------|--------------------------------------------------|----------------------------------------------------------------------------------------------------------------------------------------------------------------------------------------------------------------------------------------------------------------------------------------------------------------------------------------------------------------------------------------------------------------------------------------------------------------------------------------------------------------------------------------------------------------------------------------------------------------------------------------------------------------------------------------------------------------------------------------------------------------------------------------------------------------------------------------------------------------------------------------------------------------------------------------------------------------------------------------------------------------------------------------------------------------------------------------------------------------------------------------------------------------------------------------------------------------------------------------------------------------------------------------------------------------------------------------------------------------------------------------------------------------------------------------------------------------------------------------------------------------------------------------------------------------------------------------------------------------------------------------------------------------------------------------------------------------------------------------------------------------------------------------------------------------------------------------------------------------------------|
| Kandemirli <sup>6</sup> | 27                                    | Turkey   | Retrospective study examining COVID-19 ICU patients with neurologic symptoms. 19 patients intubated, 8 noninvasive ventilator support.               | 63 years old (range 34–87) 21 males 6 females    | -12/27 patients with acute findings:<br>-10 patients with cortical FLAIR signal abnormality; 3 of which with subcortical and deep white matter signal abnormality, 7 with cortical restricted diffusion, 5 with subtle leptomeningeal enhancement, and 3 cases with punctate cortical blooming.<br>-1 patient with dural venous sinus thrombosis.<br>-1 patient with acute infarct in the right middle cerebral artery territory.<br><br>-15 patients: no acute findings<br>27 patients in total:<br>11 COVID-19 patients included in the study:<br>-4 patients with diffuse white matter abnormality, interpreted as leukoencephalopathy,<br>-1 patient with parenchymal microhemorrhages on susceptibility-weighted imaging<br>-6 with a combination of white matter abnormality and microhemorrhages<br><br>-Leukoencephalopathy described as “T2 hyperintensities that were symmetric and confluent, demonstrated mild restricted diffusion, and involved bilateral and deep and subcortical white matter.”<br>-Microhemorrhages predominately reported in juxtacortical white matter, and the corpus callosum.<br>16 COVID-19 patients excluded from the study:<br>-11 with acute or subacute infarcts (include 3 with microhemorrhagic transformation)<br>-4 with parenchymal hemorrhages<br>-1 with thalamic expansile T2 hyperintensity<br>-1 with thalamic expansive T2 hyperintensity<br>Acute MRI brain findings/diagnoses:<br>-1 Acute ischemic infarct<br>-1 Cranial nerve enhancement (Miller-Fisher syndrome).<br>-1 PRES<br>-1 acute encephalopathy<br>-2 non-specific encephalopathy<br>-1 hypoxic-ischemic encephalopathy<br>-2 exacerbation of demyelinating disease<br>-8 patients with leptomeningeal enhancement<br>-11 patients with bilateral frontotemporal hypoperfusion<br>-2 patients with small acute infarcts<br>-1 patient subacute infarct |
| Radmanesh <sup>7</sup>  | 27                                    | New York | Retrospective study of 11 COVID-19 ICU patients with depressed mental status and specific MRI findings.<br>All were intubated mean duration 27 days. | 53 years old (range 38–64) 9 males, 2 females    |                                                                                                                                                                                                                                                                                                                                                                                                                                                                                                                                                                                                                                                                                                                                                                                                                                                                                                                                                                                                                                                                                                                                                                                                                                                                                                                                                                                                                                                                                                                                                                                                                                                                                                                                                                                                                                                                            |
| Mahammedi <sup>8</sup>  | 20                                    | Italy    | Retrospective study evaluating neuroimaging in hospitalized COVID-19 patients with acute neurological symptoms.                                      | Not available for patients with MRI brain exams  |                                                                                                                                                                                                                                                                                                                                                                                                                                                                                                                                                                                                                                                                                                                                                                                                                                                                                                                                                                                                                                                                                                                                                                                                                                                                                                                                                                                                                                                                                                                                                                                                                                                                                                                                                                                                                                                                            |
| Helms <sup>1</sup>      | 13                                    | France   | Observational series of COVID-19 patients with ARDS. MRI brain scans performed for unexplained encephalopathy.                                       | Not available for patients with brain MR imaging |                                                                                                                                                                                                                                                                                                                                                                                                                                                                                                                                                                                                                                                                                                                                                                                                                                                                                                                                                                                                                                                                                                                                                                                                                                                                                                                                                                                                                                                                                                                                                                                                                                                                                                                                                                                                                                                                            |

Continued on next page

**On-line Table: Continued**

| Articles                | Location        | No. of Patients with Brain MR Imaging | Type of Study and Clinical Features of Patients with COVID-19                                                                                                                  | Average Age and Sex                                 | Findings                                                                                                                                                                                                                                                                                                                                                                                                                                                                                                                                                                                                                                                                                |
|-------------------------|-----------------|---------------------------------------|--------------------------------------------------------------------------------------------------------------------------------------------------------------------------------|-----------------------------------------------------|-----------------------------------------------------------------------------------------------------------------------------------------------------------------------------------------------------------------------------------------------------------------------------------------------------------------------------------------------------------------------------------------------------------------------------------------------------------------------------------------------------------------------------------------------------------------------------------------------------------------------------------------------------------------------------------------|
| Helm <sup>9</sup>       | France          | 10                                    | Prospective cohort study evaluating 150 patients with COVID-19 ARDS. Primary end-point was to compare thrombotic events in patients with COVID-19 ARDS from non-COVID-19 ARDS. | Not available for patients with MRI brain exams     | 10 patients with brain MRI examinations<br>-2 patients with left cerebellar ischemic stroke: one acute and one likely pre-existing to COVID-19 infection<br>-1 patient had bilateral multiple periventricular ischemic lesions<br>-1 patient with acute intraparenchymal hematoma and multiple recent ischemic lesions                                                                                                                                                                                                                                                                                                                                                                  |
| Dogan <sup>24</sup>     | Turkey          | 6                                     | Case series reporting plasmapheresis in 6 COVID-19 patients with meningoencephalitis.                                                                                          | 49 y/o male 59 y/o male 22 y/o male                 | -Patient 1: Cortical FLAIR hyperintensity and leptomeningeal enhancement.<br>-Patient 2: Cortical and white matter FLAIR hyperintensity. Subarachnoid hemorrhage.<br>-Patient 6: Findings consistent meningoencephalitis, not further specified.                                                                                                                                                                                                                                                                                                                                                                                                                                        |
| Tunç <sup>25</sup>      | Turkey          | 4                                     | Case series 4 patients with acute ischemic strokes. None were ventilated.                                                                                                      | 45 y/o female 67 y/o female 72 y/o male 77 y/o male | -3 patients had normal MRI brain exams<br>-right MCA acute infarcts<br>-left lentikulostriate acute infarcts<br>-left MCA acute infarcts<br>-right pontine infarct<br>-Left PICA acute infarct. Subsequent bilateral PCA acute infarcts.<br>-acute corpus striatum infarct<br>-acute infarcts in right thalamus, left pons, right occipital lobe, right cerebellum                                                                                                                                                                                                                                                                                                                      |
| Beyrouti <sup>26</sup>  | United Kingdom  | 3                                     | Case series 6 patients with acute ischemic strokes.                                                                                                                            | 64 y/o male 61 y/o male, 73 y/o male.               | -Left PICA acute infarct. Subsequent bilateral PCA acute infarcts.<br>-acute corpus striatum infarct<br>-acute infarcts in right thalamus, left pons, right occipital lobe, right cerebellum                                                                                                                                                                                                                                                                                                                                                                                                                                                                                            |
| Nicholson <sup>16</sup> | Toronto, Canada | 2                                     | Case series of 4 patients, MRI brain obtained in 2. Both patients with MRI were on ECMO therapy.                                                                               | 57 y/o male 62 y/o male                             | Patient 1:<br>-petechial parenchymal hemorrhages on SWI, with some small parenchymal hematomas.<br>-diffuse extensive parenchymal susceptibility SWI abnormality, possibly correlating to a venular distribution and predominantly in a sub-cortical pattern.<br>-few scattered multifocal cortical infarcts.<br>Patient 2:<br>-multifocal 'blooming' in the subarachnoid and subpial spaces along the cortex in a gyriform pattern.<br>-extensive abnormal SWI signal tracking along small cortical veins<br>-mild FLAIR hyperintensity in some cortical regions.<br>-T2 hyperintensity in subcortical white matter, with callosal involvement.<br>-trace intraventricular hemorrhage. |

*Continued on next page*

**On-line Table: Continued**

| Articles                  | Location       | No. of Patients with Brain MR Imaging | Type of Study and Clinical Features of Patients with COVID-19                                                      | Average Age and Sex          | Findings                                                                                                                                                                                                                                                                                                                                                                                                                                                                                                                                                              |
|---------------------------|----------------|---------------------------------------|--------------------------------------------------------------------------------------------------------------------|------------------------------|-----------------------------------------------------------------------------------------------------------------------------------------------------------------------------------------------------------------------------------------------------------------------------------------------------------------------------------------------------------------------------------------------------------------------------------------------------------------------------------------------------------------------------------------------------------------------|
| Francheschi <sup>27</sup> |                | 2                                     | Case series<br>2 patients with altered mental status.<br>-1 patient required ventilation.                          | 48 y/o male<br>67 y/o female | Hemorrhagic posterior reversible encephalopathy syndrome:<br>Patient 1:<br>-Edema in parieto-occipital regions with subacute blood products.<br>-diffuse petechial hemorrhages through the corpus callosum.<br>-small right occipital infarct<br>Patient 2:<br>-Edema in parieto-occipital regions<br>-posterior infarcts<br>-superimposed hemorrhages<br>Confluent regions of restricted diffusion within subcortical and deep hemispheric white matter, with microhemorrhages.<br>Diffusion and FLAIR hyperintensity in the right mesial temporal lobe/hippocampus. |
| Cavalcanti <sup>28</sup>  | New York       | 1                                     | Case Series in COVID-19 patients with cerebral venous thrombosis                                                   | 28 y/o male                  |                                                                                                                                                                                                                                                                                                                                                                                                                                                                                                                                                                       |
| Moriguchi <sup>29</sup>   | Japan          | 1                                     | Case report<br>Meningitis/encephalitis presenting with seizures and impaired consciousness. Patient was intubated. | 24 y/o male                  |                                                                                                                                                                                                                                                                                                                                                                                                                                                                                                                                                                       |
| Sachs <sup>30</sup>       | North Carolina | 1                                     | Case report<br>Intubated ICU patient.                                                                              | 59 y/o male                  | -diffuse, confluent, posterior predominant white matter T2/FLAIR hyperintensity<br>-scattered micro-hemorrhage predominantly in the corpus callosum.<br>-posterior circulation hyperperfusion on ASL.<br>MRI exams day 1 and 9 post admission were normal                                                                                                                                                                                                                                                                                                             |
| Pilotto <sup>31</sup>     | Italy          | 1                                     | Case report<br>Encephalitis with severe alteration of consciousness, EEG with generalized slowing.                 | 60 y/o male                  |                                                                                                                                                                                                                                                                                                                                                                                                                                                                                                                                                                       |
| Poyiadji <sup>32</sup>    | Detroit        | 1                                     | Case report<br>Altered mental status.                                                                              | 50's female                  | Acute hemorrhagic necrotizing encephalopathy:<br>-hemorrhagic, rim enhancing lesions in the thalami, medial temporal lobes, and subinsular regions<br>T2 hyperintensity in the right inferior cerebellar peduncle, extending into the upper spinal cord                                                                                                                                                                                                                                                                                                               |
| Wong <sup>33</sup>        | United Kingdom | 1                                     | Case report<br>COVID-19 pneumonia with multiple neurological deficits.                                             | 40 y/o male                  |                                                                                                                                                                                                                                                                                                                                                                                                                                                                                                                                                                       |

*Continued on next page*

**On-line Table: Continued**

| Articles                | Location | No. of Patients with Brain MR Imaging | Type of Study and Clinical Features of Patients with COVID-19                                                                     | Average Age and Sex | Findings                                                                                                                                                                                                                                                                                                                                                                                                                                                                                        |
|-------------------------|----------|---------------------------------------|-----------------------------------------------------------------------------------------------------------------------------------|---------------------|-------------------------------------------------------------------------------------------------------------------------------------------------------------------------------------------------------------------------------------------------------------------------------------------------------------------------------------------------------------------------------------------------------------------------------------------------------------------------------------------------|
| Zanin <sup>34</sup>     | Italy    | 1                                     | Case report<br>Intubated patient with COVID-19 pneumonia and seizures.                                                            | 54 y/o female       | -multiple T2 hyperintense, nonenhancing periventricular white matter lesions, with pattern suggestive of demyelination<br>-T2 hyperintense lesions at the bulbo-meullary junction and cervicothoracic spinal cord<br>-lesions were new from prior MRI brain exams<br>PRES-like syndrome:<br>-bilateral occipital and frontal cortical white matter, corpus callosum splenium T2/FLAIR hyperintensities and restricted diffusion.<br>-Imaging findings resolved on follow-up MRI two weeks later |
| Kaya <sup>35</sup>      | Turkey   | 1                                     | Case report<br>COVID-19 pneumonia requiring non-invasive mechanical ventilator support; altered consciousness, acute vision loss. | 38 y/o male         | Edema and enlargement of bilateral olfactory bulbs.<br>Follow-up MRI demonstrated resolution<br>Deep cerebral vein hemorrhagic venous infarction:<br>-occluded internal cerebral veins and vein of Galen (on CT venogram)<br>-deep right hemispheric vasogenic edema with regions of hemorrhage.<br>Acute infarct left medial temporal lobe                                                                                                                                                     |
| Laurendon <sup>36</sup> | France   | 1                                     | Case report<br>Anosmia and dysgeusia                                                                                              | 27 y/o male         |                                                                                                                                                                                                                                                                                                                                                                                                                                                                                                 |
| Chougar <sup>37</sup>   | France   | 1                                     | Case report<br>Altered mental status, status epilepticus, mild respiratory symptoms                                               | 72 y/o male         |                                                                                                                                                                                                                                                                                                                                                                                                                                                                                                 |
| Avula <sup>38</sup>     | New York | 1                                     | Case report<br>Shortness of breath, right arm weakness                                                                            | 88 y/o female       |                                                                                                                                                                                                                                                                                                                                                                                                                                                                                                 |
| Piloti <sup>39</sup>    | Italy    | 1                                     | Case Report<br>Cough with anosmia                                                                                                 | 25 y/o female       | Cortical signal abnormality in the right gyrus rectus, and hyperintensity in the olfactory bulbs. Follow-up MRI brain 28 days later was normal.                                                                                                                                                                                                                                                                                                                                                 |

**Note:**—ECOM indicates extracorporeal membrane oxygenation; ICU, intensive care unit; PCA, posterior cerebral artery; ASL, arterial spin-labeling; EEG, electroencephalography; ARDS, Acute Respiratory Distress Syndrome.
